# Supplementary material for: TRPM7 activity drives human CD4 T-cell activation and differentiation in a magnesium dependent manner
Source: PubMed Central journal article supplement — bioRxiv. 2024 Dec 7:2024.12.04.626765. Preprint. [Version 1] doi: 10.1101/2024.12.04.626765 (PMC11643021; doi:10.1101/2024.12.04.626765), 2024-12-07
Supplement: NIHPP2024.12.04.626765v1-supplement-1.pdf [file NIHPP2024.12.04.626765v1-supplement-1.pdf]

1 **TRPM7 activity drives human CD4 T-cell activation and differentiation in a Mg<sup>2+</sup>**  
2 **dependent manner**

3

4 Kilian Hoelting<sup>1#</sup>, Anna Madlmayr<sup>2#</sup>, Birgit Hoeger<sup>2</sup>, Dorothea Lewitz<sup>1</sup>, Marius Weng<sup>2</sup>, Tanja Haider<sup>2</sup>,  
5 Michelle Duggan<sup>2</sup>, Rylee Ross<sup>3</sup>, F. David Horgen<sup>3</sup>, Markus Sperandio<sup>4</sup>, Alexander Dietrich<sup>1</sup>, Thomas  
6 Gudermann<sup>1</sup>, Susanna Zierler<sup>1,2\*</sup>

7

8 <sup>1</sup>Walther Straub Institute of Pharmacology and Toxicology, Ludwig-Maximilians-Universität München,  
9 Goethestr.33, 80336 Munich, Germany

10 <sup>2</sup>Institute of Pharmacology, Johannes Kepler University Linz, Altenbergerstr. 69, 4040 Linz, Austria

11 <sup>3</sup>Laboratory of Marine Biological Chemistry, Hawai'i Pacific University, 1042 Fort Street Mall,  
12 Honolulu, HI 96813, USA

13 <sup>4</sup>Institute of Cardiovascular Physiology and Pathophysiology, Biomedical Center, Ludwig-Maximilians-  
14 Universität München, Großharderner Str. 9, 82152 Planegg-Martinsried, Germany

15 #these authors contributed equally to this work

16 \*to whom correspondence should be addressed: susanna.zierler@jku.at

17

18

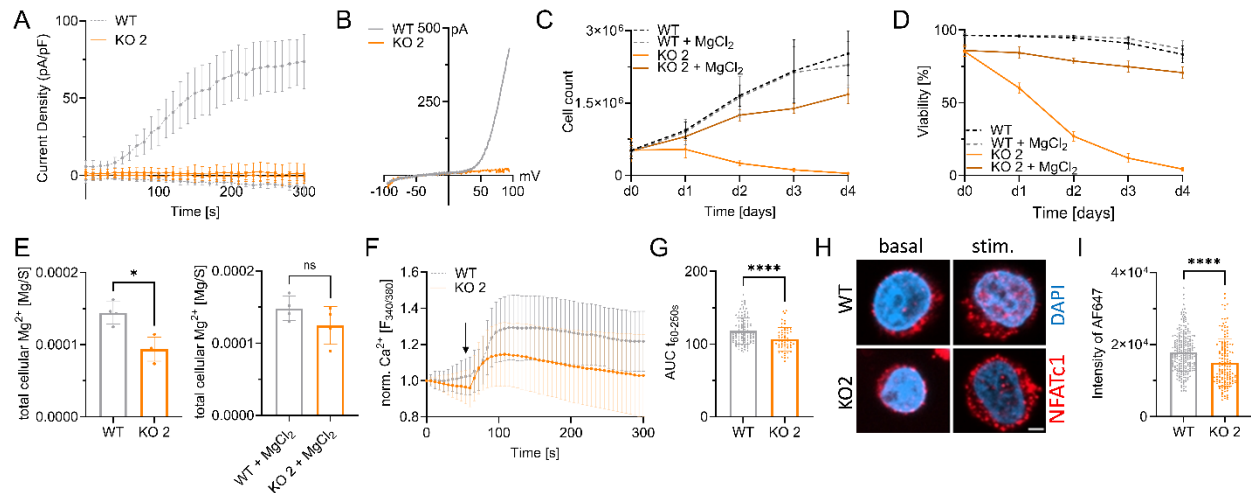

19

20 **Supplementary Figure 1: Validation of Jurkat TRPM7 KO clone 2 shows reduced proliferation**  
 21 **and activation**

22 A) TRPM7 current densities and B) TRPM7 I/V relationship of Jurkat cells during whole-cell patch  
 23 clamp experiment with Mg<sup>2+</sup>-free intracellular solution. WT (WT, grey) and TRPM7 KO2 Jurkat clone  
 24 (KO2, orange). n(WT)=9; n(KO2)=10. C) Cell counts and D) viability of natively proliferating TRPM7  
 25 WT and KO2 Jurkat clone in RPMI medium with 10% FBS, with and without supplementation with 6  
 26 mM MgCl<sub>2</sub>. n=3, measured in duplicates. E) Cellular Mg contents quantified by ICP-MS. WT and  
 27 TRPM7 KO2 Jurkat clone, cultured in regular (WT-)media or in medium supplemented with 6 mM  
 28 MgCl<sub>2</sub> for 18 h ahead of sampling, n=4. F) Fura-2 based imaging of cytosolic Ca<sup>2+</sup> concentration of  
 29 Jurkat cells. Stimulation with 5 μM thapsigargin at indicated time point (arrow). WT (WT, grey) and  
 30 TRPM7 KO2 (KO2, orange) Jurkat clone, n (WT) =111; n (KO2) = 59; G) Quantification of the area  
 31 under the curve (AUC) of respective curves shown in F. H) Representative immuno-fluorescent images  
 32 of NFATc1 localization in WT and KO2 clone before (basal) and after 30 min stimulation (stim.) with 5  
 33 μM thapsigargin, scale bar = 2 μm. NFATc1 in red, DAPI in blue. I) Quantification of nuclear NFATc1  
 34 levels upon stimulation of TRPM7 WT (WT, grey) and KO (KO2, orange) clone. n (WT) = 261; n  
 35 (KO2) = 149. Statistics: Two-way ANOVA (C, D), one-way ANOVA (E) or Student's t test (G, I). \*  
 36 P<0.05; and \*\*\*\* P<0.0001. Data are mean ± SD.

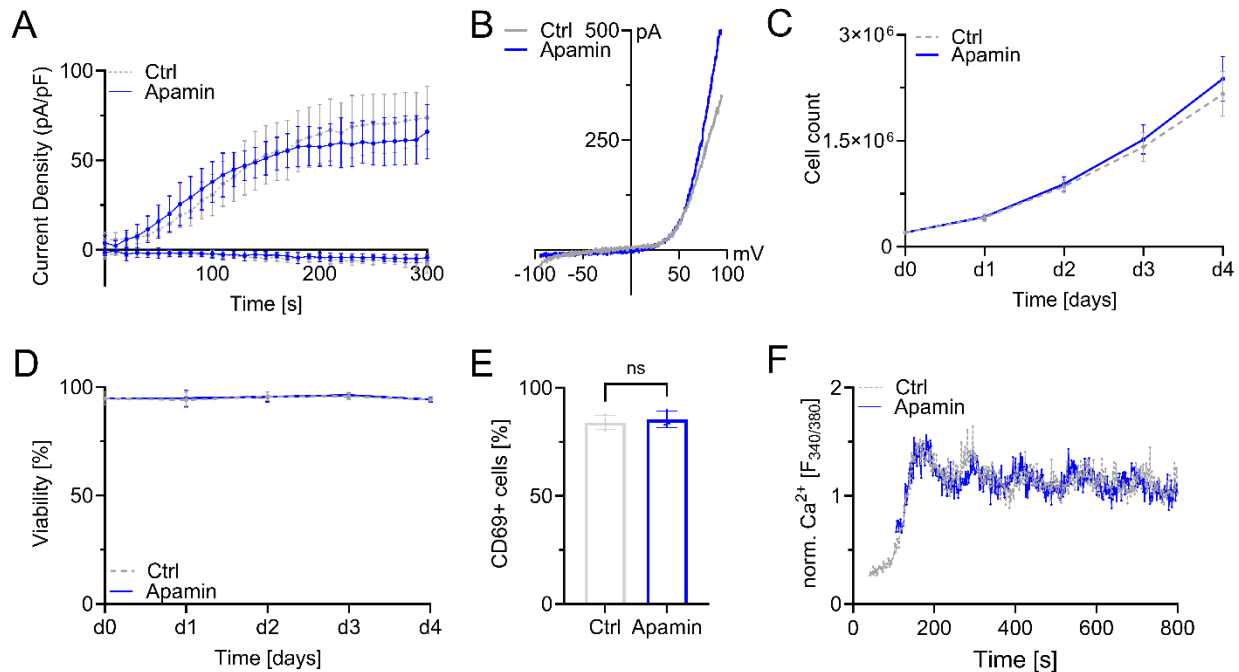

37

### 38 **Supplementary Figure 2: Apamin as control substance for potential off target effects of NS8593**

39 A) TRPM7 current densities and B) TRPM7 I/V relationship of Jurkat T cells during whole-cell patch  
 40 clamp experiment with  $Mg^{2+}$ -free intracellular solution. Controls (Ctrl, grey) and cells treated with 1  
 41  $\mu$ M apamin (Apamin, blue), n (Ctrl)=9, n (Apamin)=6. C) Cell counts and D) viability of natively  
 42 proliferating Jurkat cells in RPMI medium with 10% FBS, with and without 1  $\mu$ M apamin (Apamin,  
 43 blue), n=4. E) Flow cytometry of upregulation of activation markers CD69 in primary CD4 T-  
 44 lymphocytes 48 h after anti-CD3/CD28 stimulation. Cells treated either as control (Ctrl, grey) or with 1  
 45  $\mu$ M apamin (Apamin, blue), n=4. F) Representative trace of CD4 T cells Fura-2 based imaging of  
 46 cytosolic  $Ca^{2+}$  concentrations following anti-CD3/CD28 stimulation. Antibodies bound to microscopy  
 47 chamber bottom with cells sinking down in saline containing 2 mM  $Ca^{2+}$  during running measurement,  
 48 coming to rest in focus plane with contact to stimulation antibodies. Cells measured as control (Ctrl,  
 49 grey) or in presence of 1  $\mu$ M apamin (Apamin, blue). Statistics: Student's t test (D). n.s.—not  
 50 significant. Data are mean  $\pm$  SD.

51

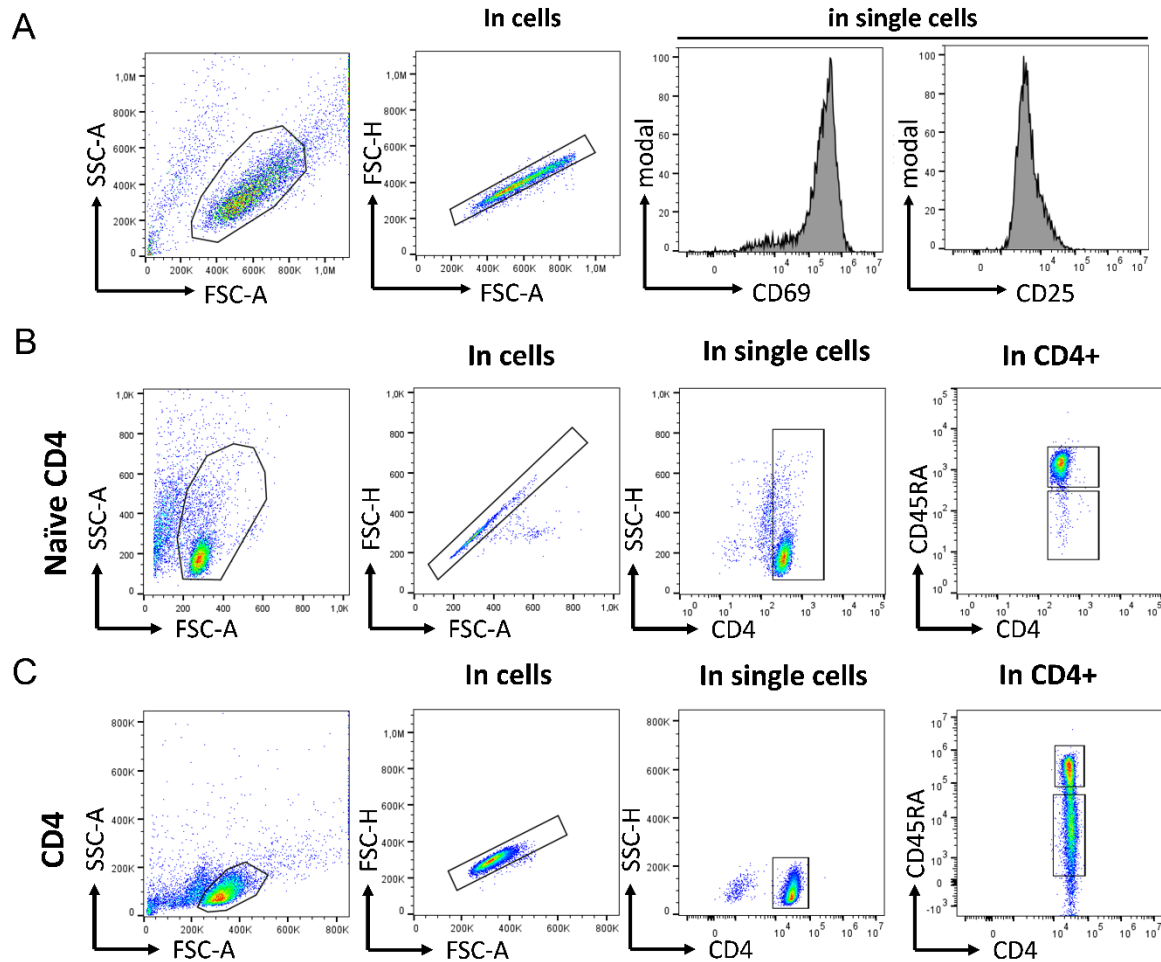

52

53 **Supplementary Figure 3: T cell isolation controls and additional FACS data**

54 A) Representative FACS plots and gating strategy for CD69 and CD25 visualization, shown for Jurkat

55 WT cells. B) Representative FACS plots and gating strategy to confirm identify of isolated naïve CD4

56 T cells and C) conventional CD4 T cells.

57



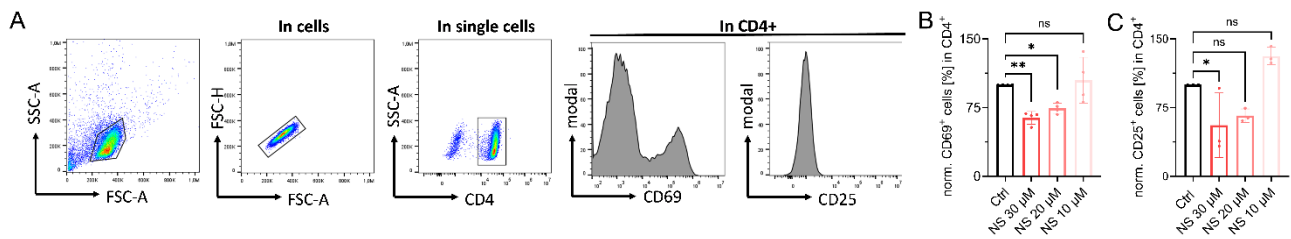

58

59 **Supplementary Figure 4: Dose response curve of TRPM7 inhibitor NS8593 on CD4 T-cell**  
 60 **activation**

61 A) Representative FACS plots and gating strategy for CD69 and CD25 shown for conventional CD4 T  
 62 cells. B+C) Quantification of flow cytometry data of NS8593 dose-dependent upregulation of CD69  
 63 (B) and CD25 (C) expression on conventional CD4 T cells, 48 h after anti-CD3/CD28 stimulation or  
 64 PMA/ionomycin stimulation, respectively, n=3-4. Statistics: One-way ANOVA (B, C). \* P<0.05; \*\*  
 65 P<0.005 and n.s.—not significant. Data are mean ± SD.

66

67

68

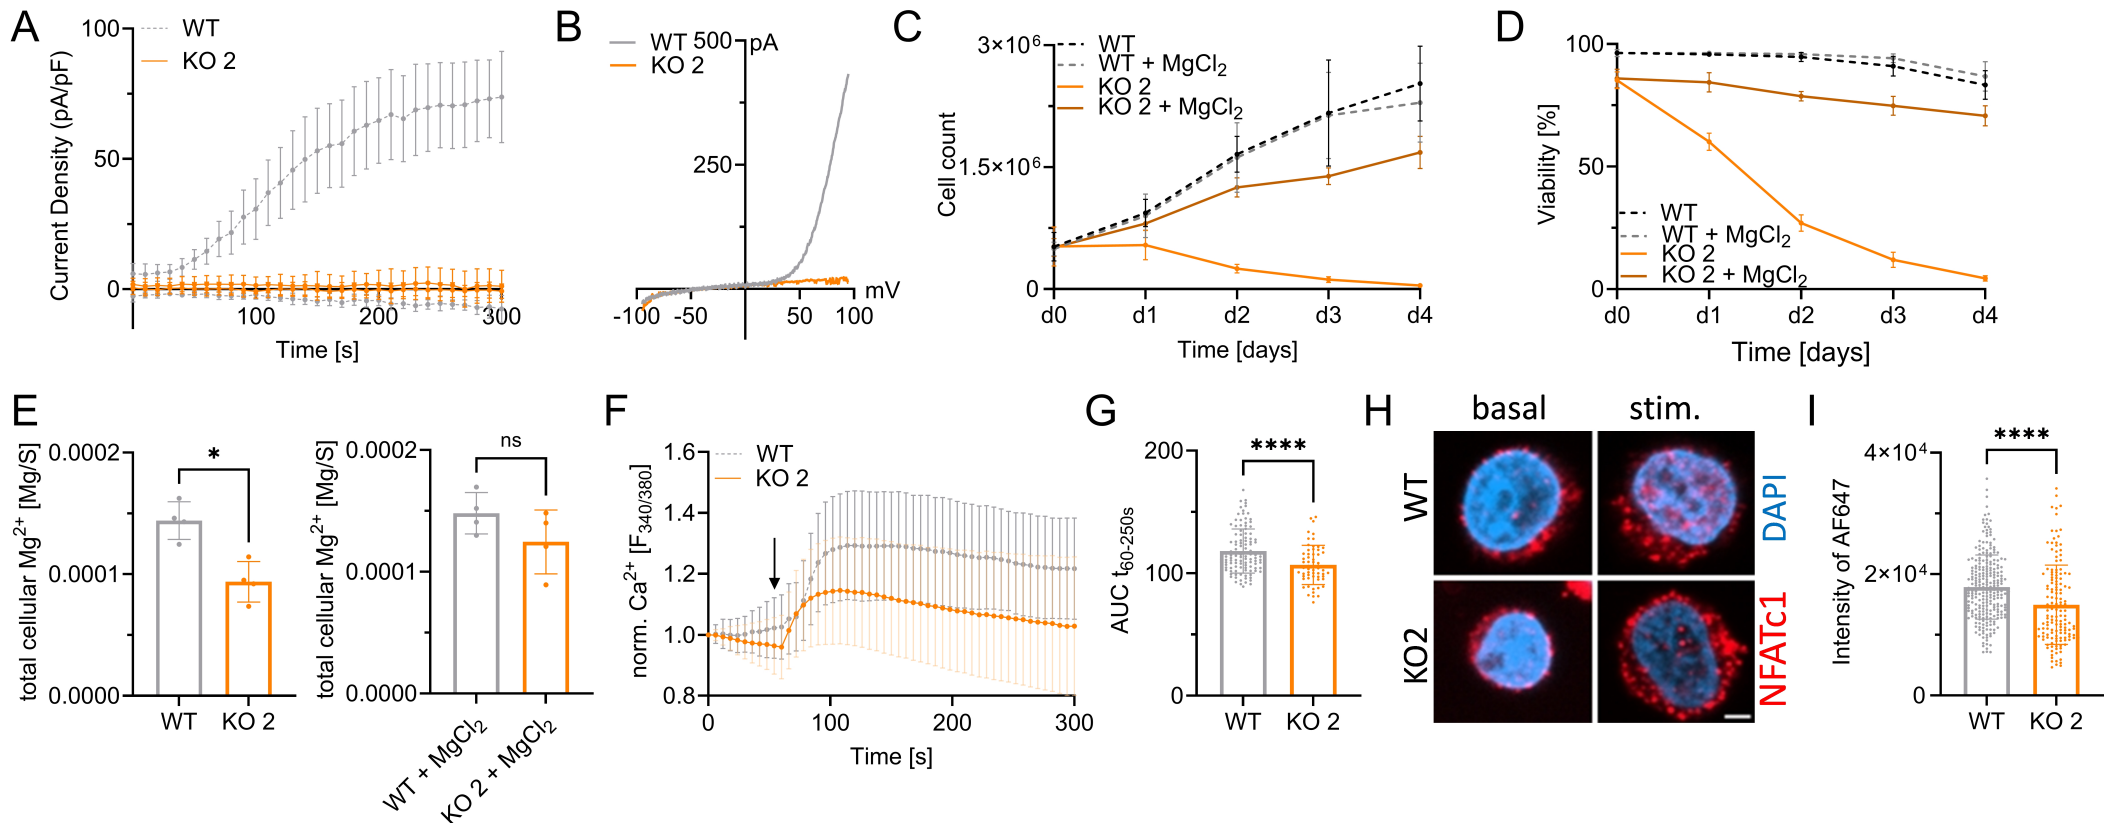

**Supplementary Figure 1: Validation of Jurkat TRPM7 KO clone 2 shows reduced proliferation and activation**

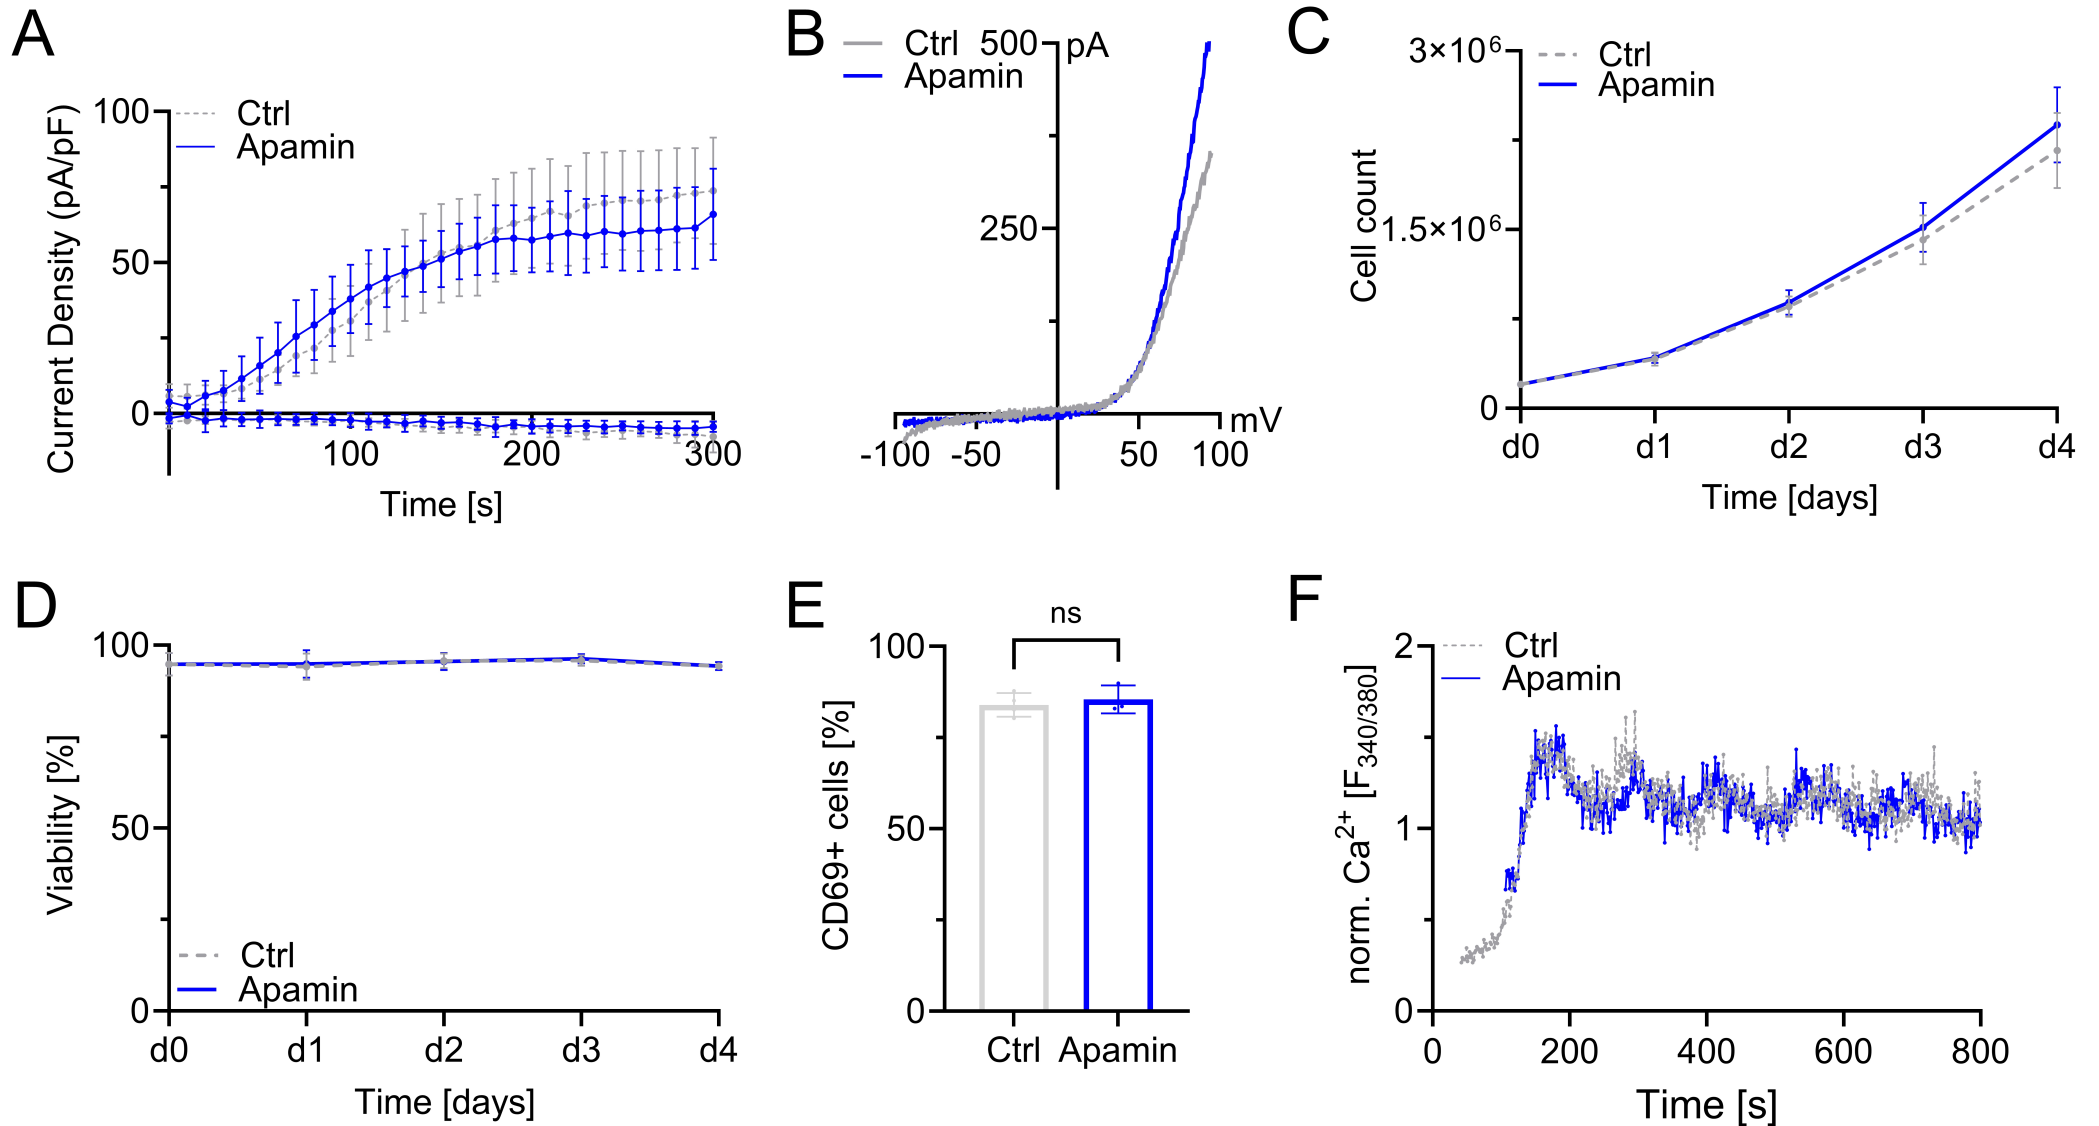

**Supplementary Figure 2: Apamin as control substance for potential off target effects of NS8593 on SK channels**

**A**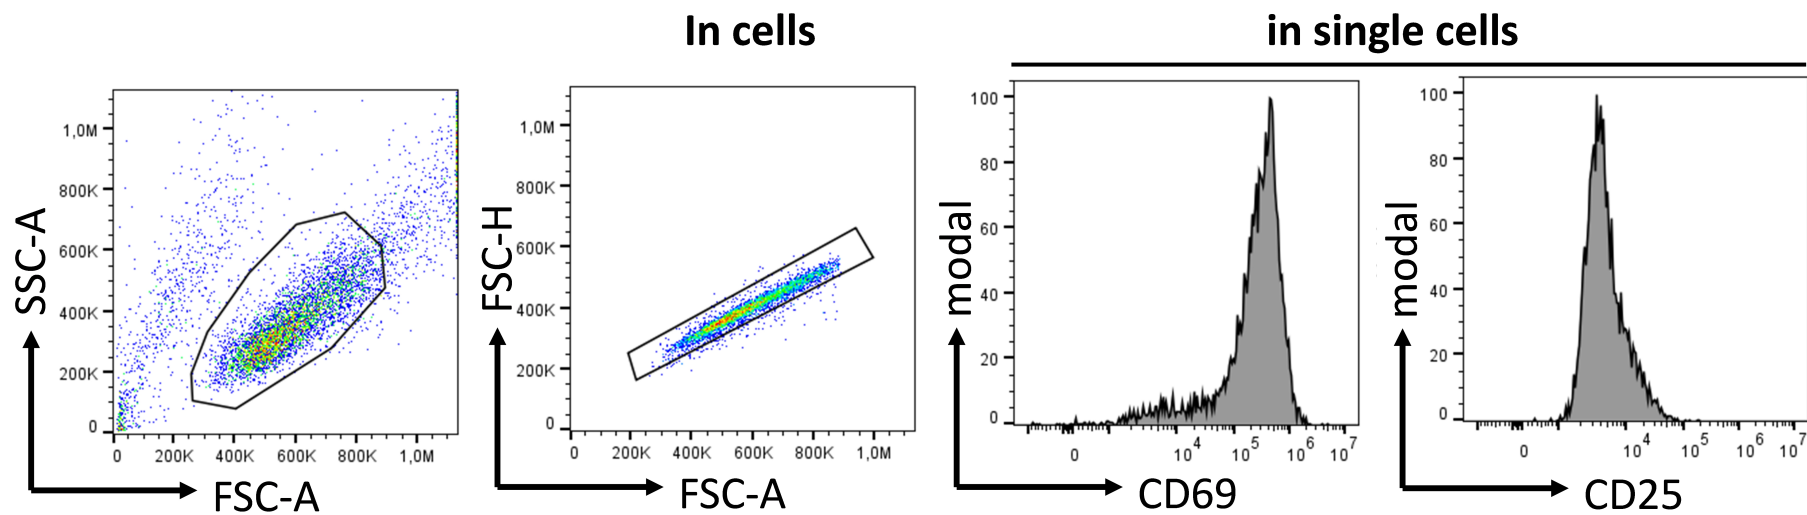**B**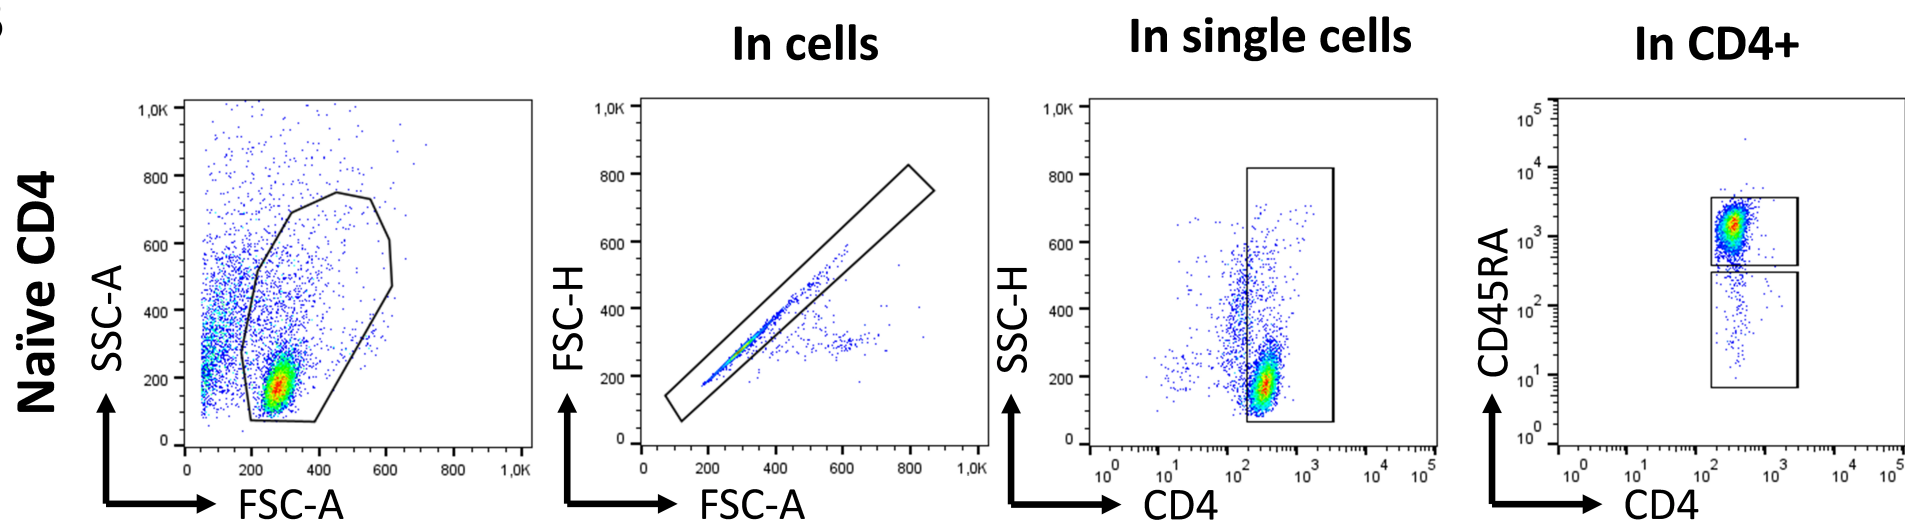**C**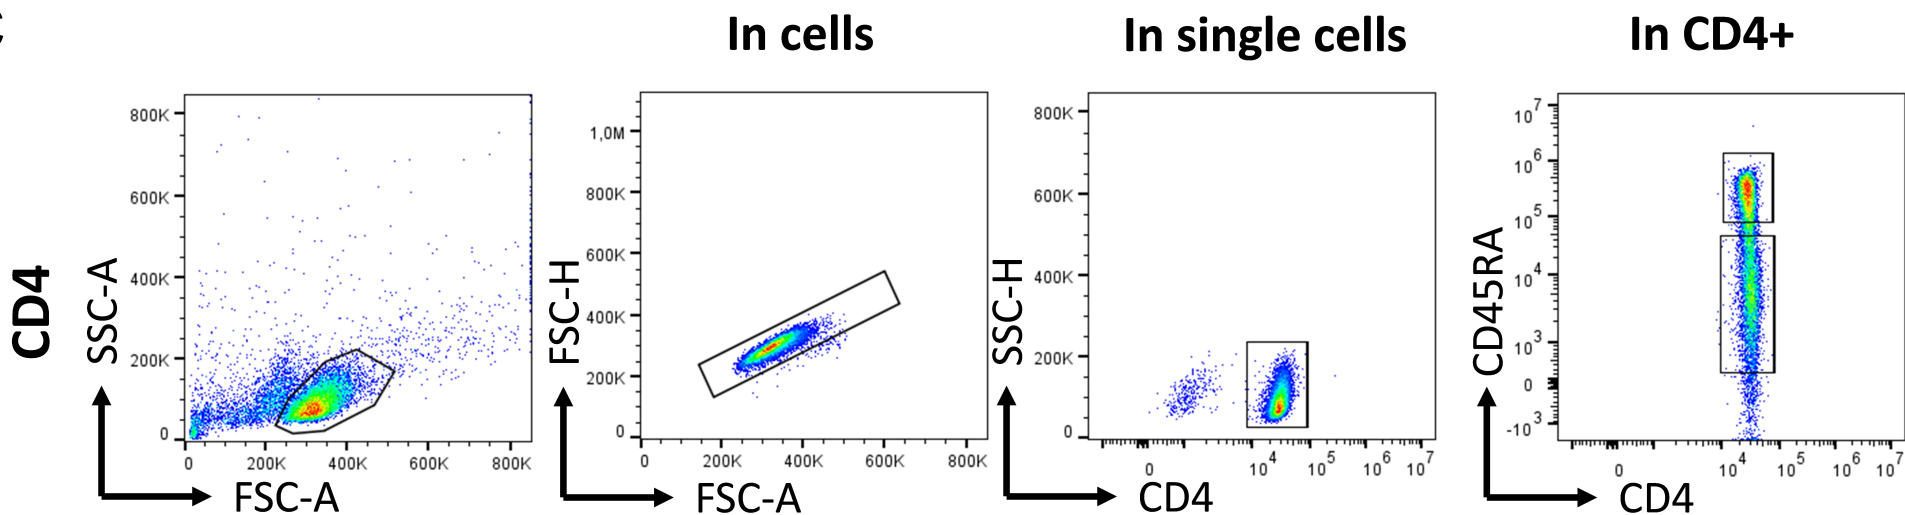

**Supplementary Figure 3: Isolation controls and additional FACS data**

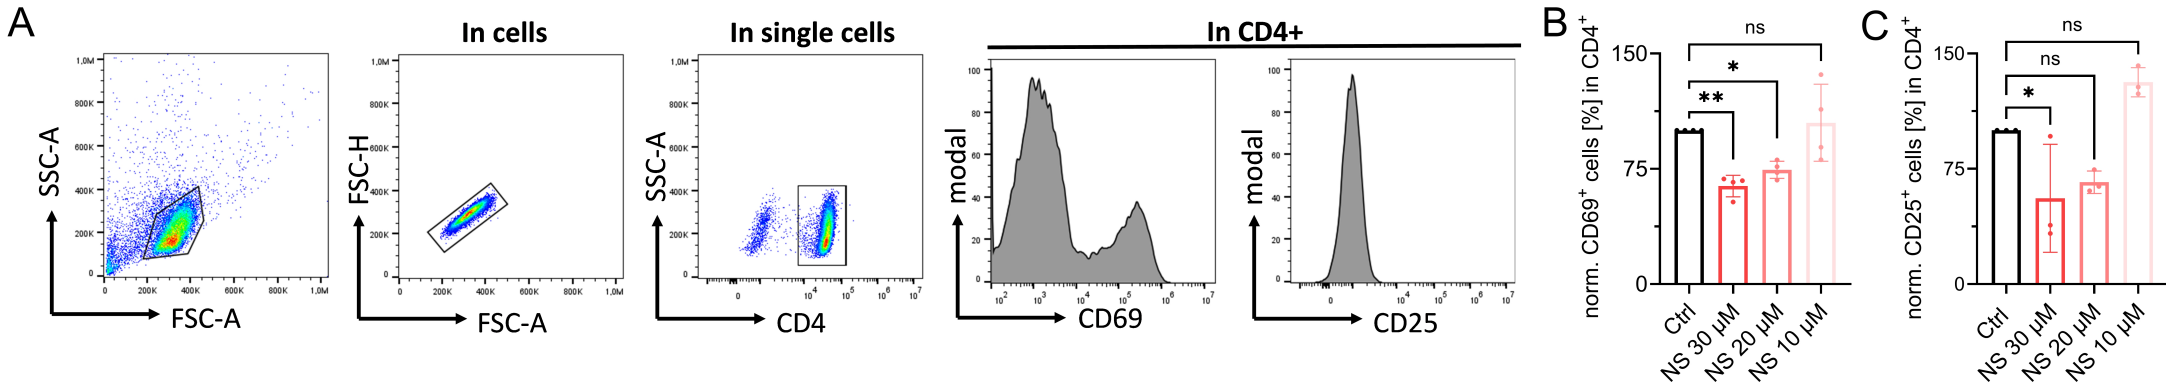

**Supplementary Figure 4: Dose response curve of TRPM7 inhibitor NS8593 on CD4 T cells**
